# Supplementary material
Source: PubMed Central journal article supplement (PMC122232)
Supplement: pnas_99_3_1574__1.pdf [file pnas_99_3_1574__1.pdf]

**Table 2. Oligonucleotide primers used in this study**

| Primer name | Sequence (5'–3')                  |
|-------------|-----------------------------------|
| CpsL        | GGAATTTCTTAATTATCAGGAAAATTAAGGG   |
| CpsR        | GTCAGTATACGGTGGTTTTACTTCTTCACATG  |
| CpsA1       | GTAAAGTCAATGTAATGGGCTACC          |
| CpsA2       | GTGTCTCCTGAAAAATCAGGCC            |
| CpsB1       | GATTAACGTTATTAAGTTTTGAAGGCG       |
| CpsB2       | CTATCAAACGATCTAAAATACCACC         |
| CpsC1       | GGGACCCCTCTAAAGAAACTGGGC          |
| CpsC2       | GGCAAATGATTGGTAAAAACGATAGGC       |
| CpsD1       | CGGTCTATCCAAGAATTGCCAGCTG         |
| CpsD2       | GCGTATTGCC TTCACGTTGCGTTGC        |
| CpsE1       | GTGTTGTCATGCCGATTCACAATGC         |
| CpsE2       | GCCAAATAACAGAATATCTGTTGC          |
| CpsF1       | CCAAAGAAAGATATTTTGGATTGAG         |
| CpsF2       | GGCGATCTATTCTACCATCCGCGC          |
| CpsG1       | GTCACTACAAGATTTAATCGTG            |
| CpsG2       | CTGCTGGACCACCAACAAAATTCG          |
| CpsH1       | TAGCAATTGGTATCGGTTGTGG            |
| CpsH2       | CCAACGCCTTCTTTTGTGTAAG            |
| CpsI1       | GAAACGTGCTCATATTGGTGGC            |
| CpsI2       | AATTACGGCATTGCCTTGTGC             |
| CpsJ1       | GCCTGTTAAA ACTTATTCTAGCGG         |
| CpsJ2       | GCTGTTGTTAATGAAATACCC             |
| CpsK1       | GGGATTGCCCTTGGTGGTGCTCG           |
| CpsK2       | CGATAAATATTACTAATGTTGTTAGCC       |
| CpsI3       | GAGAAAGCTTTACTCTAGTGAAAAATAATGC   |
| CpsI4       | GAGAAAGCTTCATTTGTTCTCCGAGTCTAACCG |
| CpsI5       | GAGACTCGAGCTTACACAAAAGAAGGCGTTGG  |
| CpsK3       | GAGACTCGAGCGGTGGTTTTACTTCTTCACATG |
