# Supplementary material
Source: PubMed Central journal article supplement (PMC122232)
Supplement: pnas_99_3_1574__2.pdf [file pnas_99_3_1574__2.pdf]

**Table 3. Database identities with ORFs in type 2 locus**

| ORF         | Blastx hit                                                        | Accession no. | Organism             | Expect value | Reference        |
|-------------|-------------------------------------------------------------------|---------------|----------------------|--------------|------------------|
| <i>cpsA</i> | Undecaprenyl pyrophosphate synthetase                             | O31751        | <i>B. subtilis</i>   | 2e-78        | Unpublished data |
| <i>cpsB</i> | Phosphatidate cytidyltransferase                                  | O31752        | <i>B. subtilis</i>   | 6e-46        | Unpublished data |
| <i>cpsC</i> | Glycerophosphotransferase<br>Teichoic acid synthesis (TagF)       | P13485        | <i>B. subtilis</i>   | e-100        | 1                |
| <i>cpsD</i> | Glycosyl transferase (Cap33fJ)                                    | CAA07403      | <i>S. pneumoniae</i> | 3e-12        | 2                |
| <i>cpsE</i> | Putative sugar transferase                                        | CAB73862      | <i>C. jejuni</i>     | 2e-34        | 3                |
| <i>cpsF</i> | No good match                                                     |               |                      |              |                  |
| <i>cpsG</i> | UDP- <i>N</i> -acetylenolpyruvoyl<br>glucosamine reductase (MurB) | P18579        | <i>B. subtilis</i>   | 2e-40        | 4                |
| <i>cpsH</i> | No good match                                                     |               |                      |              |                  |
| <i>cpsI</i> | UDP-galactopyranose mutase (cap33fN)                              | CAA07407      | <i>S. pneumoniae</i> | e-137        | 2                |
| <i>cpsJ</i> | Teichoic acid translocation<br>ATP-binding protein (TagH)         | P42954        | <i>B. subtilis</i>   | 2e-80        | 5                |
| <i>cpsK</i> | Teichoic acid translocation<br>permease protein (TagG)            | P42953        | <i>B. subtilis</i>   | 3e-60        | 5                |

References:

1. Honeyman, A. L. & Stewart, G. C. (1989) *Mol. Microbiol.* **3**, 1257-1268.
2. Llull, D., Lopez, R., Garcia, E. & Munoz, R. (1998) *Biochim. Biophys. Acta* **1443**, 217-224.
3. Parkhill, J., Wren, B. W., Mungall, K., Ketley, J. M., Churcher, C., Basham, D., Chillingworth, T., Davies, R. M., Feltwell, T., Holroyd, S., *et al.* (2000) *Nature (London)* **403**, 665-668.
4. Beall, B. & Lutkenhaus, J. (1989) *J. Bacteriol.* **171**, 6821-6834.
5. Lazarevic, V. & Karamata, D. (1995) *Mol. Microbiol.* **16**, 345-355.
